# Supplementary material for: Striking influence of Fe2O3 on the “catalytic carbonization” of chlorinated poly(vinyl chloride) into carbon microspheres with high performance in the photo-degradation of Congo red
Source: Royal Society of Chemistry journal article supplement (doi:10.1039/c3ta10316a), 2013-01-01
Supplement: c3ta10316a.pdf [file c3ta10316a.pdf]

## Supporting Information

# Striking influence of Fe<sub>2</sub>O<sub>3</sub> on the “catalytic carbonization” of chlorinated poly(vinyl chloride) into carbon microspheres with high performance in the photo-degradation of Congo red

5 Jiang Gong, Kun Yao, Jie Liu, Zhiwei Jiang, Xuecheng Chen, Xin Wen, Ewa Mijowska, Nana Tian, Tao Tang\*

**Table S1** The effect of different catalyst (added amount: 5 g/100g CPVC) on the state of carbon product from commercial CPVC microspheres at 700 °C.

| Product state             | Catalyst                                                                                                                                                                                                                                                                                                                                                                                                                                                                                                                                                                                                                                                                                                                                                                                                             |
|---------------------------|----------------------------------------------------------------------------------------------------------------------------------------------------------------------------------------------------------------------------------------------------------------------------------------------------------------------------------------------------------------------------------------------------------------------------------------------------------------------------------------------------------------------------------------------------------------------------------------------------------------------------------------------------------------------------------------------------------------------------------------------------------------------------------------------------------------------|
| Microspheres              | Fe <sub>2</sub> O <sub>3</sub> , Fe(OH) <sub>3</sub> and Fe <sub>3</sub> O <sub>4</sub> . (Total of 3 kinds)                                                                                                                                                                                                                                                                                                                                                                                                                                                                                                                                                                                                                                                                                                         |
| “Sponge-like” carbon lump | (1) no catalyst;                                                                                                                                                                                                                                                                                                                                                                                                                                                                                                                                                                                                                                                                                                                                                                                                     |
|                           | (2) common nickel catalyst: Ni <sub>2</sub> O <sub>3</sub> , NiO, F-NiO, Ni(OH) <sub>2</sub> , NiCl <sub>2</sub> , NiSO <sub>4</sub> , Ni(NO <sub>3</sub> ) <sub>2</sub> , NiCO <sub>3</sub> ·2Ni(OH) <sub>2</sub> ·4H <sub>2</sub> O, Ni(COO) <sub>2</sub> and Ni(CO) <sub>5</sub> ; (10 kinds)                                                                                                                                                                                                                                                                                                                                                                                                                                                                                                                     |
|                           | (3) common cobalt catalyst: Co <sub>2</sub> O <sub>3</sub> , Co <sub>3</sub> O <sub>4</sub> , Co(NO <sub>3</sub> ) <sub>2</sub> , Co(CH <sub>3</sub> COO) <sub>2</sub> and CoCl <sub>2</sub> ; (5 kinds)                                                                                                                                                                                                                                                                                                                                                                                                                                                                                                                                                                                                             |
|                           | (4) common iron catalyst: Fe(NO <sub>3</sub> ) <sub>3</sub> , FeCl <sub>3</sub> , FeCl <sub>2</sub> , Fe powder, FeSO <sub>4</sub> , FeS and Fe(C <sub>5</sub> H <sub>5</sub> ) <sub>2</sub> ; (7 kinds)                                                                                                                                                                                                                                                                                                                                                                                                                                                                                                                                                                                                             |
|                           | (5) common other catalyst: CuO, Cu(NO <sub>3</sub> ) <sub>2</sub> , CuS, CuCl, CuBr, CuSO <sub>4</sub> , Cu <sub>2</sub> (OH) <sub>2</sub> CO <sub>3</sub> ; MgCl <sub>2</sub> , MgO, Mg powder, MgCO <sub>3</sub> , Mg(NO <sub>3</sub> ) <sub>2</sub> ; AgCl, AgNO <sub>3</sub> ; Cd(OH) <sub>2</sub> ; NH <sub>4</sub> Cl, NH <sub>4</sub> Br, BaCl <sub>2</sub> , SnCl <sub>4</sub> , SnCl <sub>2</sub> , SnO <sub>2</sub> ; MnO <sub>2</sub> , La(NO <sub>3</sub> ) <sub>3</sub> , HZSM (Si/Al=25, 100, 300; NKF-6β; USY); ZnO (nanoscale), ZnO (microscale), ZnSO <sub>4</sub> , ZnCl <sub>2</sub> , Zn powder, Zn(NO <sub>3</sub> ) <sub>2</sub> ; CaCl <sub>2</sub> , CaSO <sub>4</sub> , Ca(OH) <sub>2</sub> ; NaCl, Na <sub>2</sub> SO <sub>4</sub> , ZrOCl, Ce(NO <sub>3</sub> ) <sub>3</sub> . (41 kinds) |
|                           | (Total of 63 kinds)                                                                                                                                                                                                                                                                                                                                                                                                                                                                                                                                                                                                                                                                                                                                                                                                  |

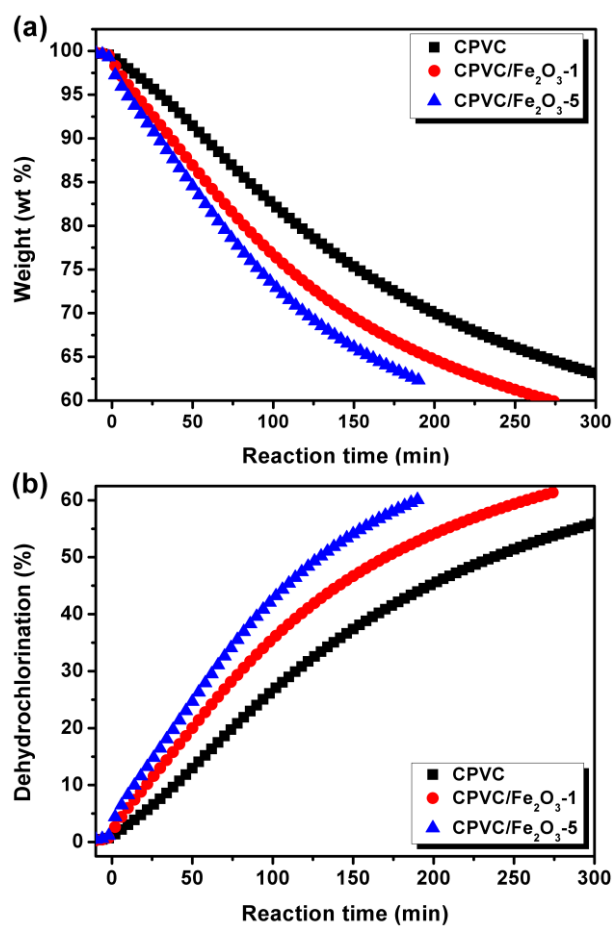

**Fig. S1** TGA curves (a) and dehydrochlorination behaviour (b) of CPVC, CPVC/Fe<sub>2</sub>O<sub>3</sub>-1 and CPVC/Fe<sub>2</sub>O<sub>3</sub>-5 through time scanning at 225 °C under nitrogen atmosphere.
